# Supplementary material for: British Thoracic Society/Intensive Care Society Guideline for the ventilatory management of acute hypercapnic respiratory failure in adults
Source: HighWire-hosted journal article supplement (doi:10.1136/bmjresp-2016-000133), 2016-03-01
Supplement: bmjresp-2016-000133supp_Appendix.pdf [file bmjresp-2016-000133supp_Appendix.pdf]

## **APPENDIX 1 Guideline group members**

Chair: Craig Davidson

Writing Groups

Acute NIV

Group lead: Mark Elliott,

Members: Colin Church, Tim Felton, Milind Sovani, Lynn McDonnell

Invasive Mechanical Ventilation

Group lead: Daniel Kennedy

Members: Ben Creagh-Brown, Craig Davidson, Alastair Glossop, Leigh Mansfield,

Care Planning

Group lead: Steve Banham

Members: Rob Parker, Craig Davidson, Ben Creagh-Brown, Lynn Thomas, Bernard Foex

The authors acknowledge assistance with developing the aims and structure of the guidelines provided by Martin Wildman, Simon Baudouin, Robert Winter, Sara Bolton, Mandy Odell, David Smith and the members of the BTS Standards of Care Committee.
